# Supplementary material for: Simultaneous degradation and reduction of multiple organic compounds by poly(vinyl imidazole) cryogel-templated Co, Ni, and Cu metal nanoparticles
Source: Royal Society of Chemistry journal article supplement (doi:10.1039/d0nj00148a), 2020-01-01
Supplement: d0nj00148a1.pdf [file d0nj00148a1.pdf]

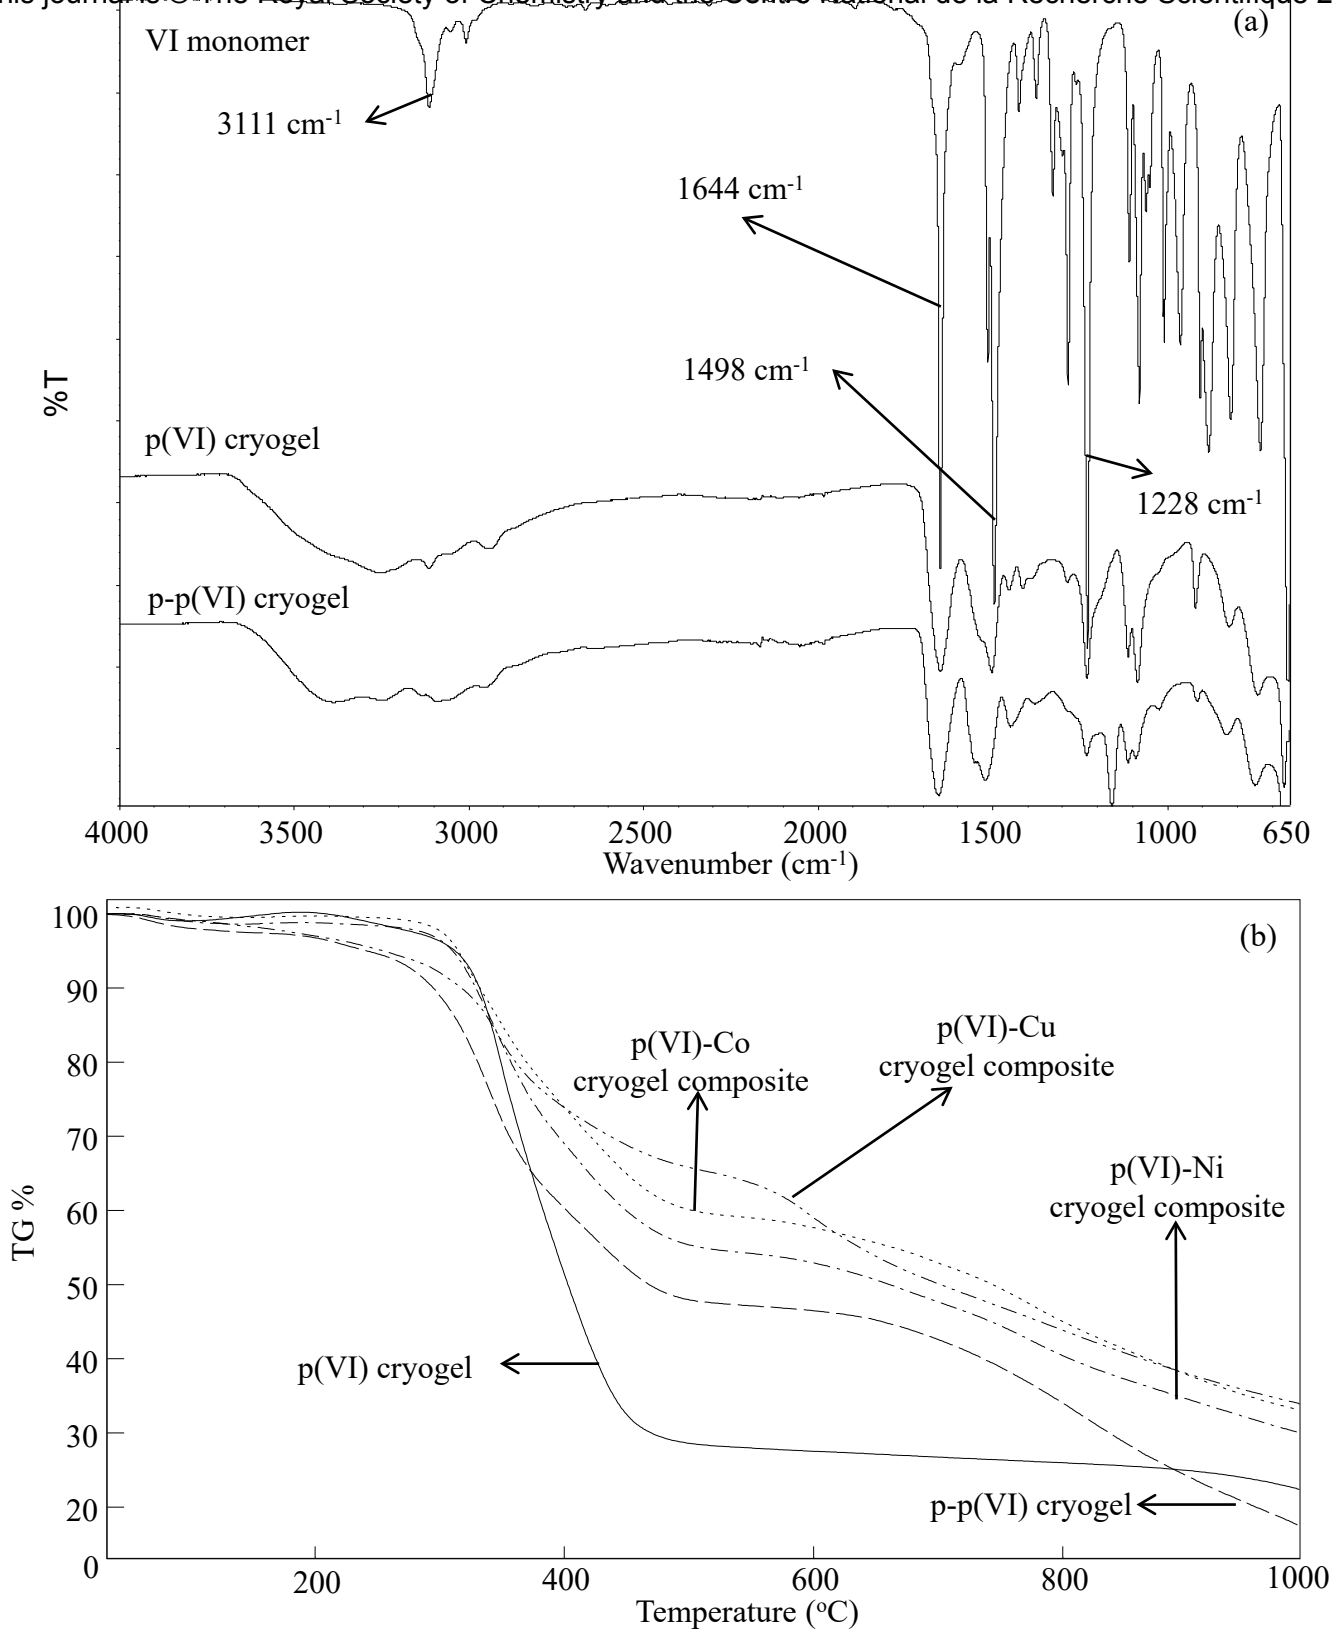

Suppl. Fig. 1. (a) FT-IR spectra of VI monomer, p(VI), and protonated p(VI) cryogels, and (b) TGA thermograms of p(VI), protonated p(VI), and p(VI)-M cryogel composites.

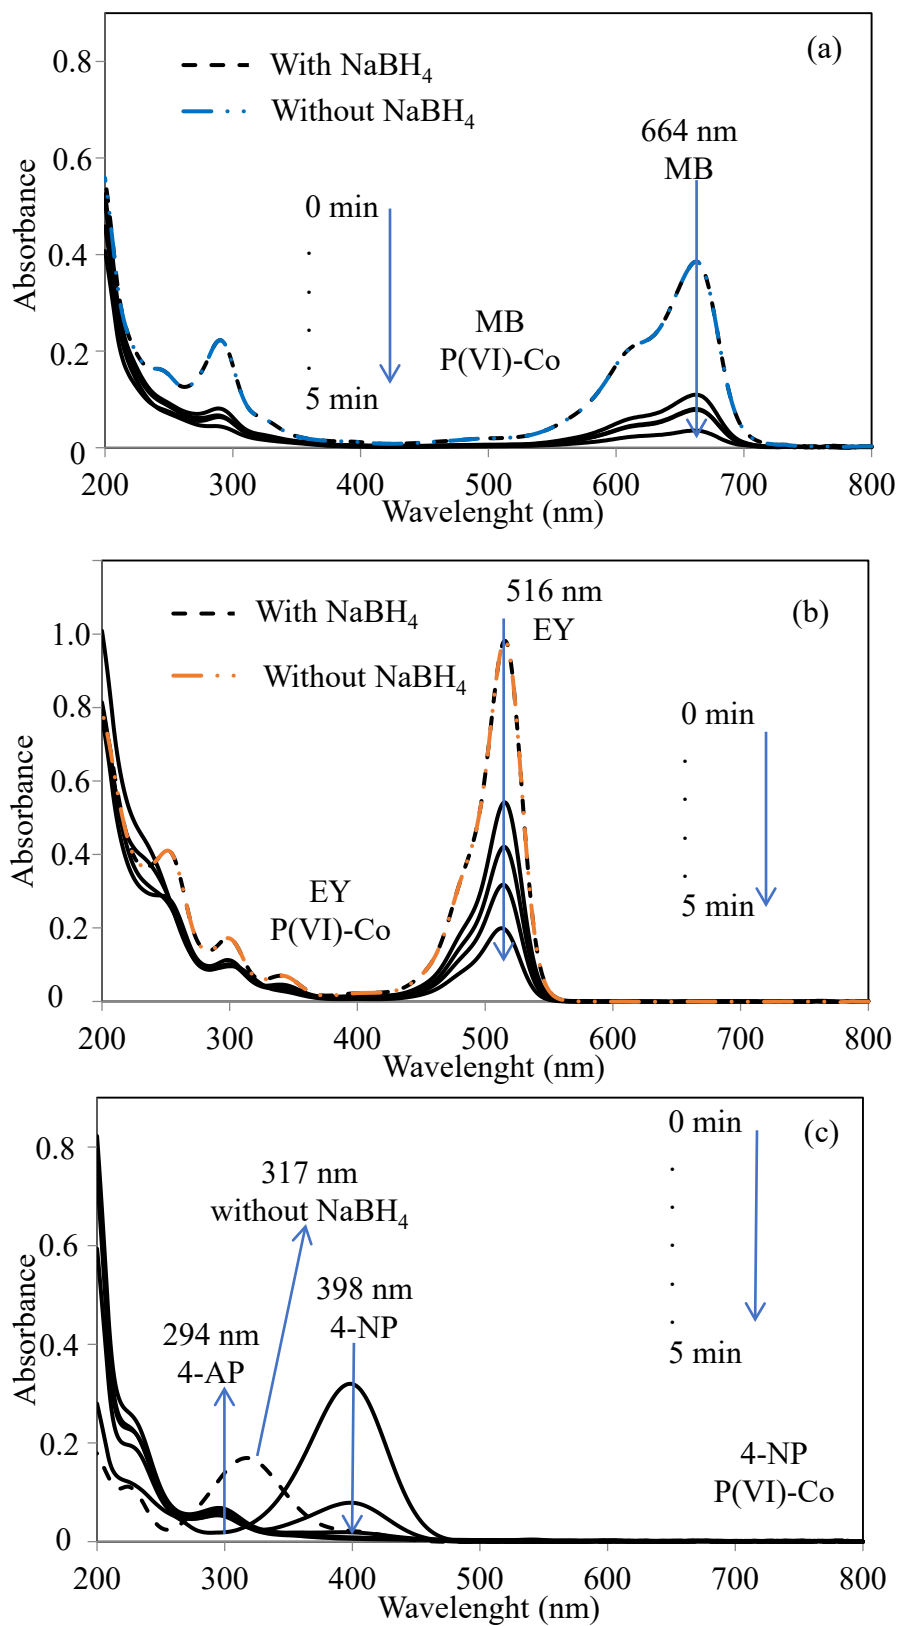

Suppl. Fig. 2. UV-Vis spectrum of p(VI)-Co cryogel composites catalyzed (a) MB degradation, (b) EY degradation, and (c) 4-NP reduction.

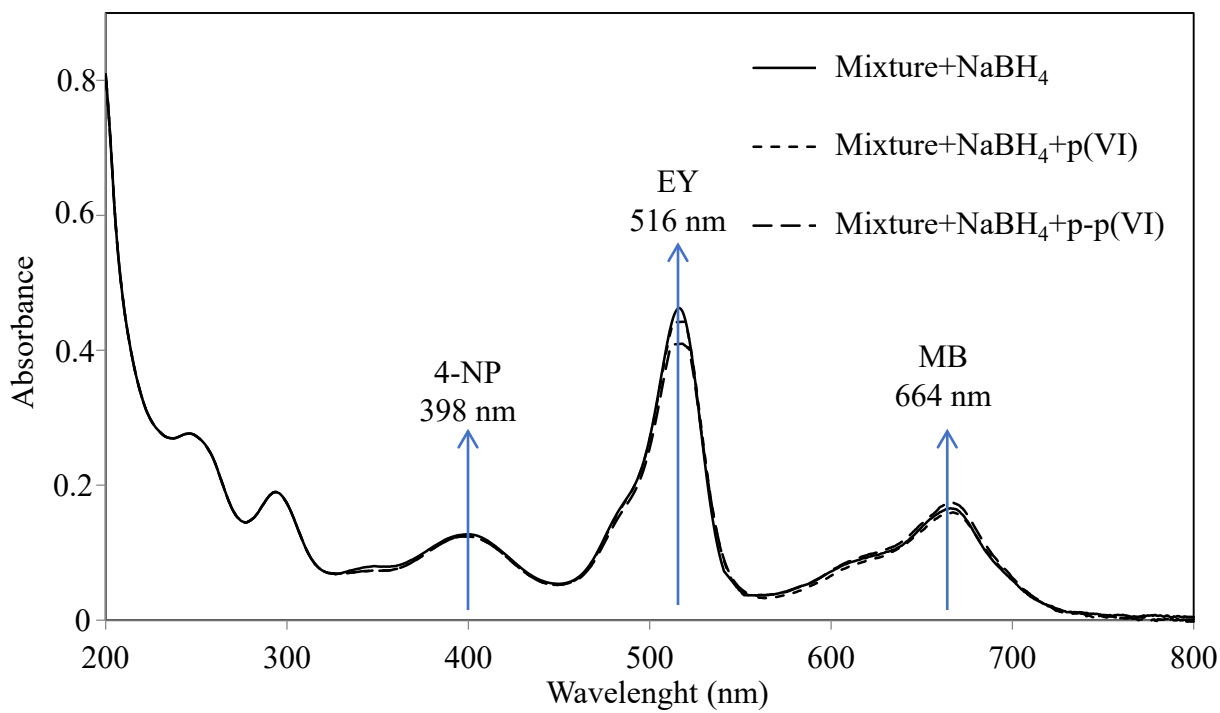

Suppl. Fig. 3. UV-Vis spectrum of MB+EY+4-NP mixture solution in the presence of NaBH<sub>4</sub>, p(VI) and p-p(VI) cryogels.

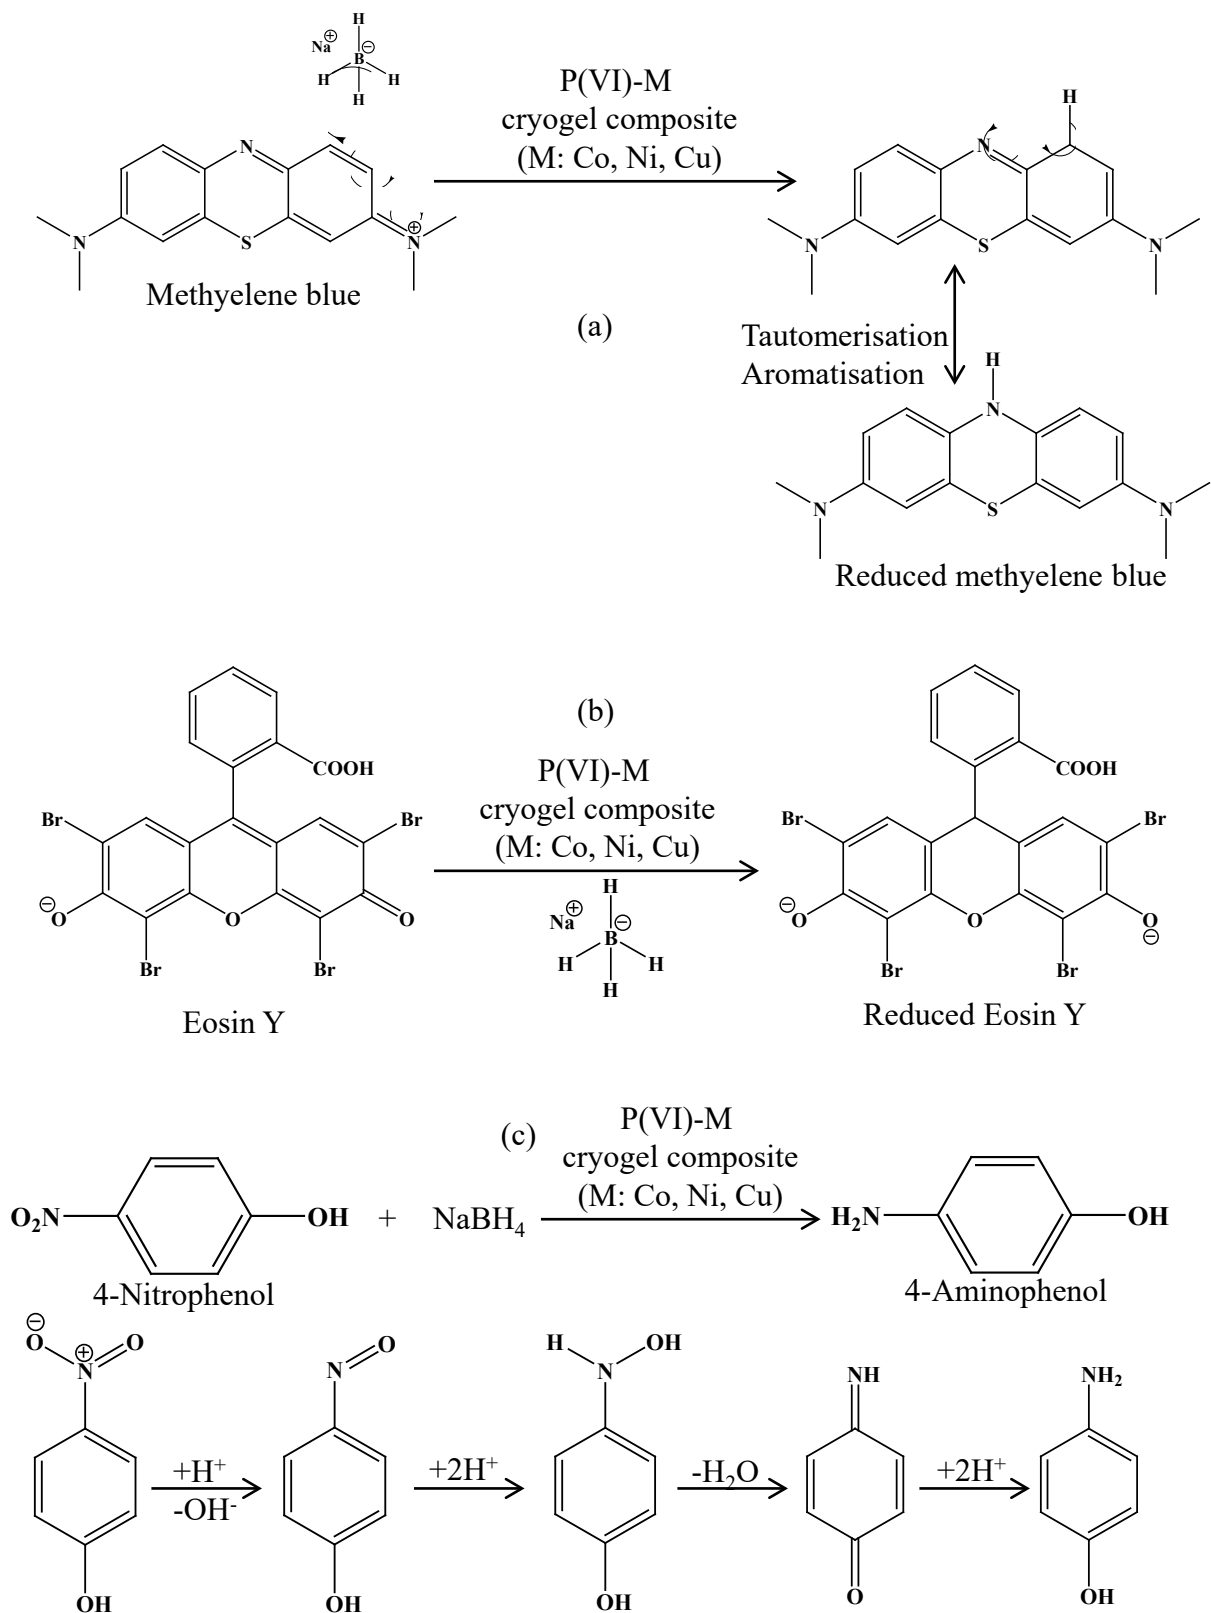

Suppl. Fig. 4. The possible mechanism for (a) degradation of MB dye, (b) degradation of EY dye, and (c) reduction 4-NP in the presence of p(VI)-M (M: Co, Ni, or Cu) cryogel composite cryogels and  $\text{NaBH}_4$ .
