# Supplementary material for: Simultaneous degradation and reduction of multiple organic compounds by poly(vinyl imidazole) cryogel-templated Co, Ni, and Cu metal nanoparticles
Source: Royal Society of Chemistry journal article supplement (doi:10.1039/d0nj00148a), 2020-01-01
Supplement: d0nj00148a2.pdf [file d0nj00148a2.pdf]

**Suppl. Table 1.** The amounts of metal nanoparticle within p(VI):M cryogel composites.

| Material | Amount of metal nanoparticles (M) (mg NP/g cryogel) |          |           |
|----------|-----------------------------------------------------|----------|-----------|
|          | Co                                                  | Ni       | Cu        |
| p(VI):M  | 48.4±2.5                                            | 37.5±3.2 | 128.2±6.3 |
